# Supplementary material for: Diversity of virulence level phenotype of hypervirulent Klebsiella pneumoniae from different sequence type lineage
Source: PubMed Central journal article supplement (PMC6116568; doi:10.1186/s12866-018-1236-2), 2018-08-29

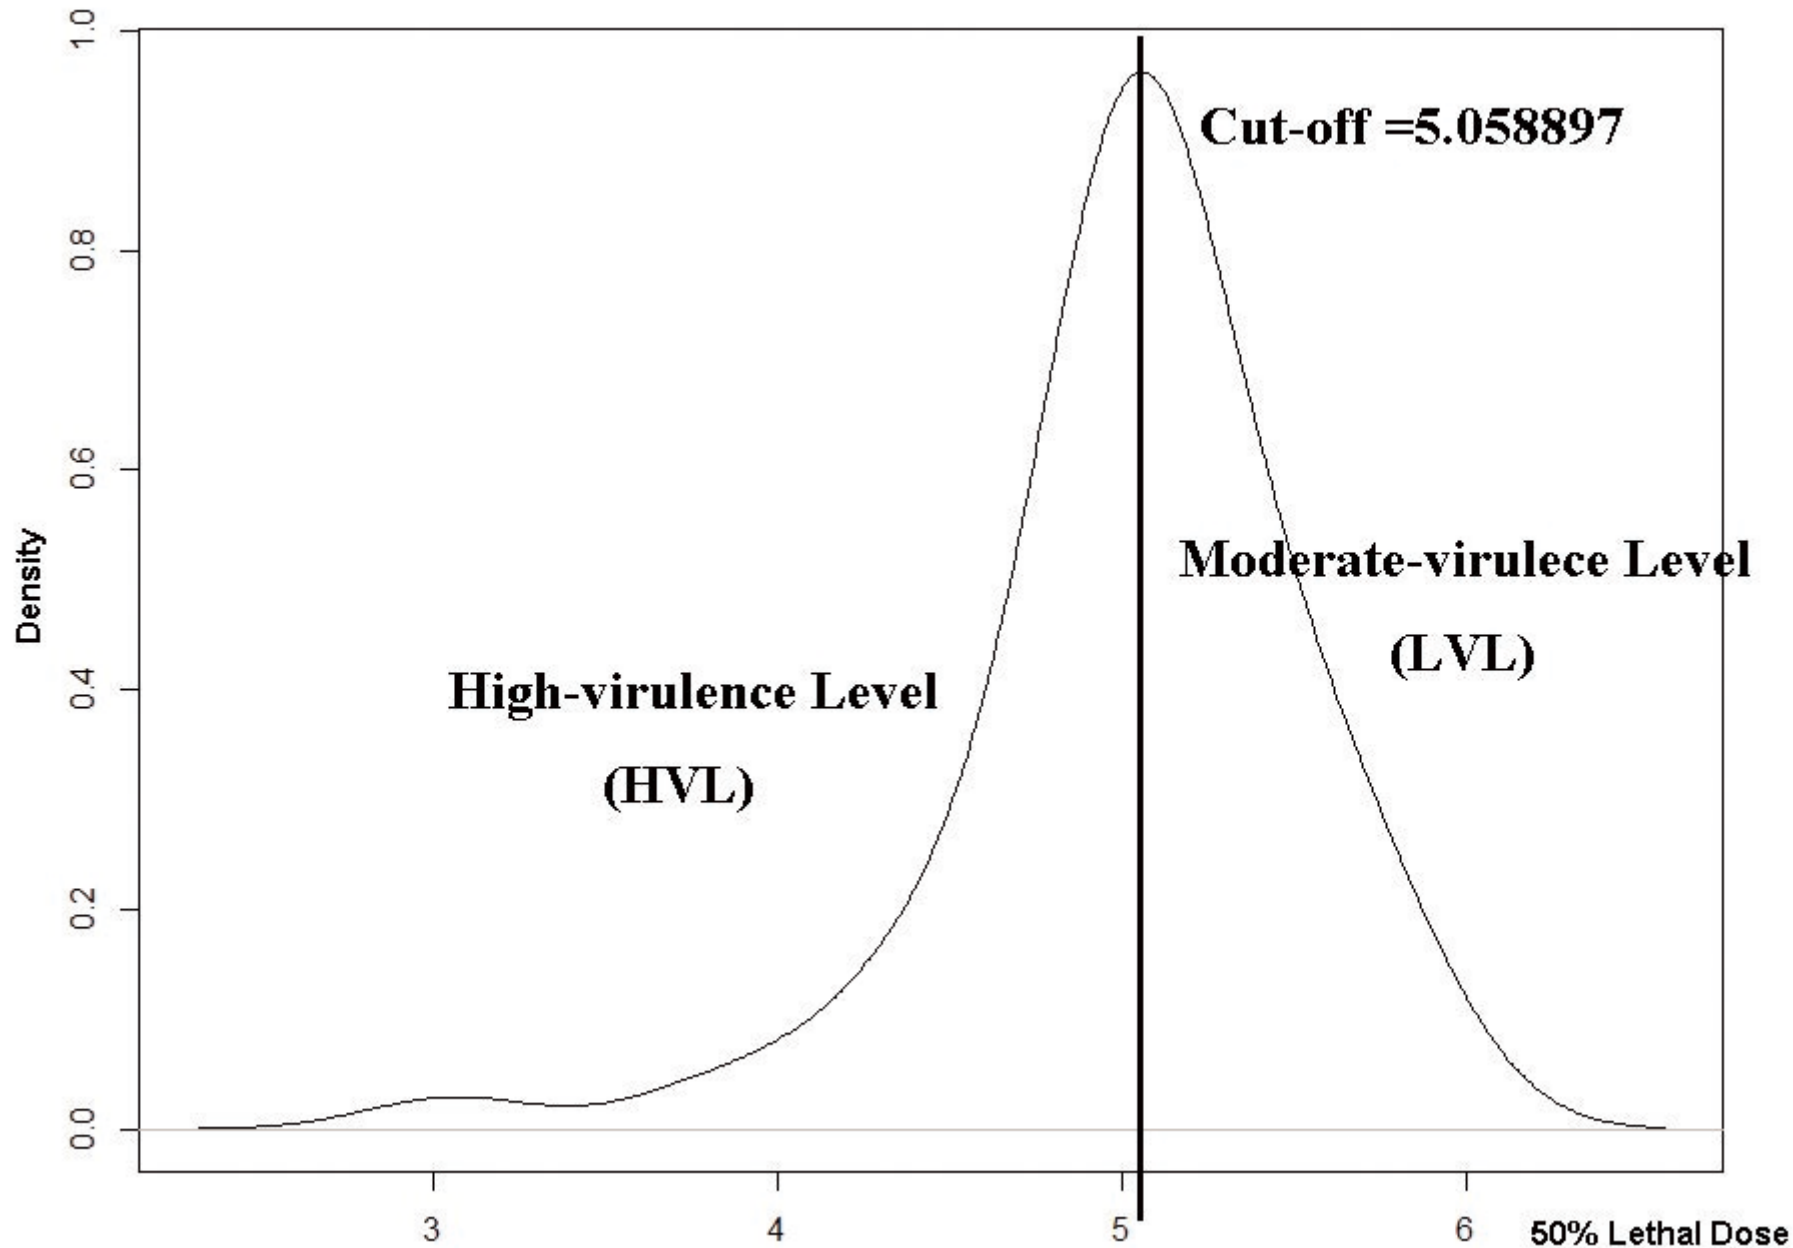

Supplement: 12866_2018_1236_MOESM1_ESM.pdf [file 12866_2018_1236_MOESM1_ESM.pdf]
